# Supplementary material for: Hydrogen adsorption on various transition metal (111) surfaces in water: a DFT forecast
Source: Royal Society of Chemistry journal article supplement (doi:10.1039/d3cp05884k), 2024-01-01
Supplement: d3cp05884k1.pdf [file d3cp05884k1.pdf]

## Supplementary Data

### **Hydrogen Adsorption on Various Transition Metal (111) Surfaces in Water: A DFT Forecast**

Basil Raju Karimadom,<sup>a</sup> Alina Sermiagin,<sup>a</sup> Dan Meyerstein,<sup>a,b</sup> Tomer Zidki,<sup>a</sup> Amir Mizrahi,<sup>c</sup> Ronen Bar-Ziv <sup>c</sup> and Haya Kornweitz <sup>a\*</sup>

## Figures

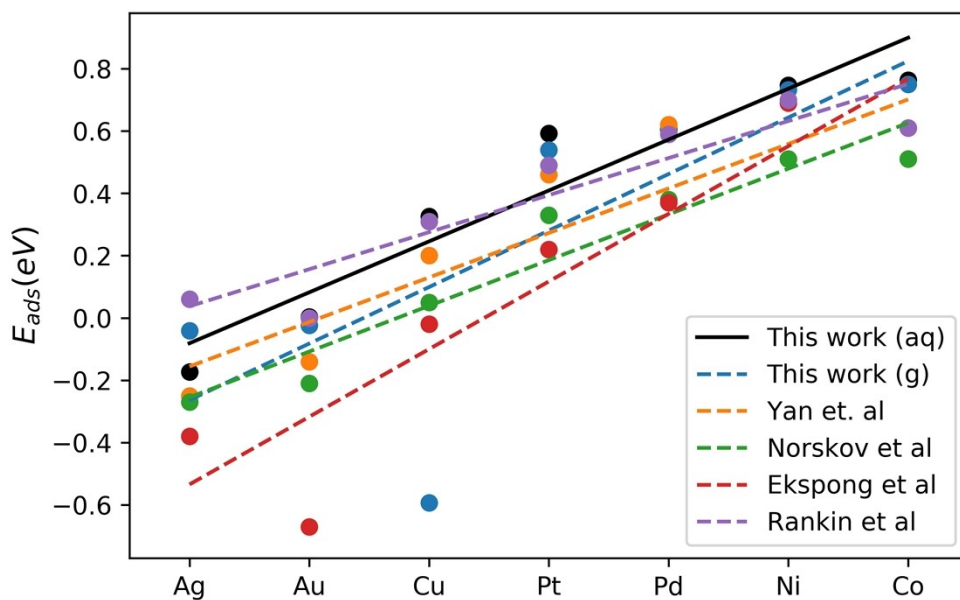

Figure S1: The adsorption-free energies of hydrogen on various metal (111) surfaces.

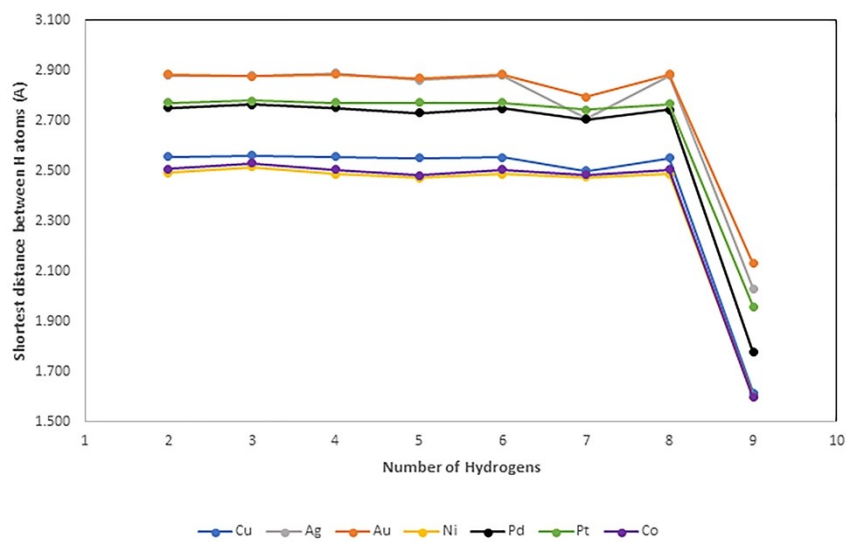

Figure S2: The shortest distance between hydrogen atoms ( $\text{\AA}$ ) on the  $M(111)$  under different surface coverage.

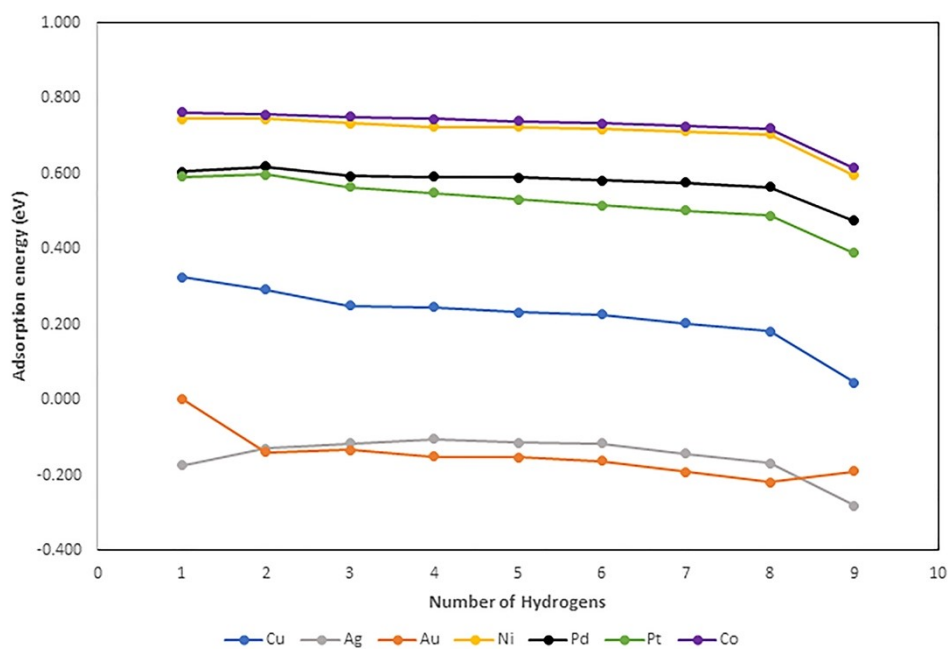

Figure S3: The adsorption energies ( $E_{ads}$ ) of hydrogens on  $M(111)$  surface

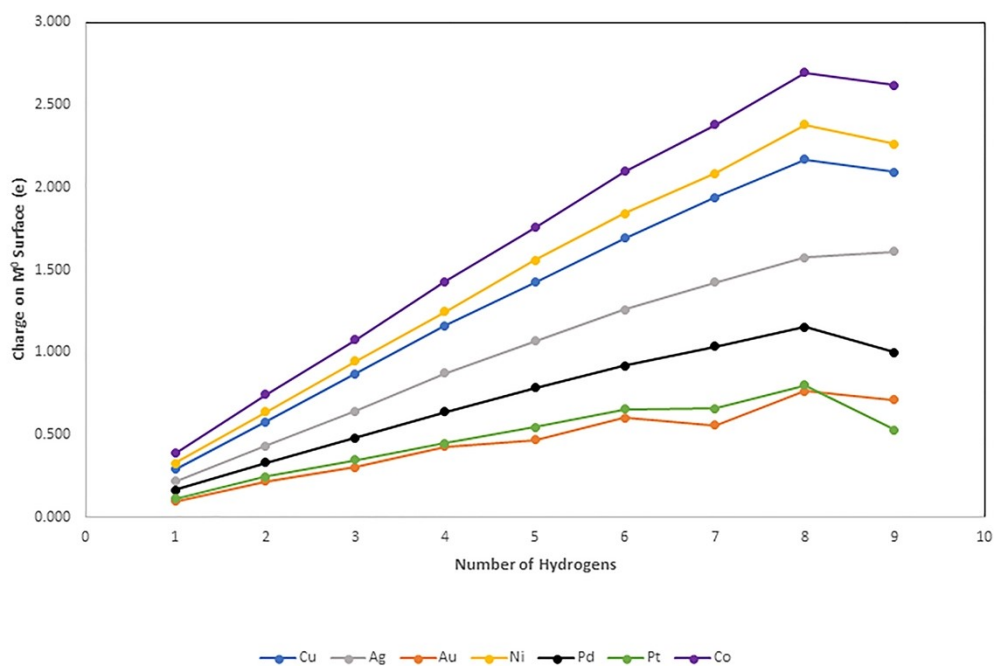

Figure S4: The charge on  $M(111)$  surface at different surface coverage of hydrogens.



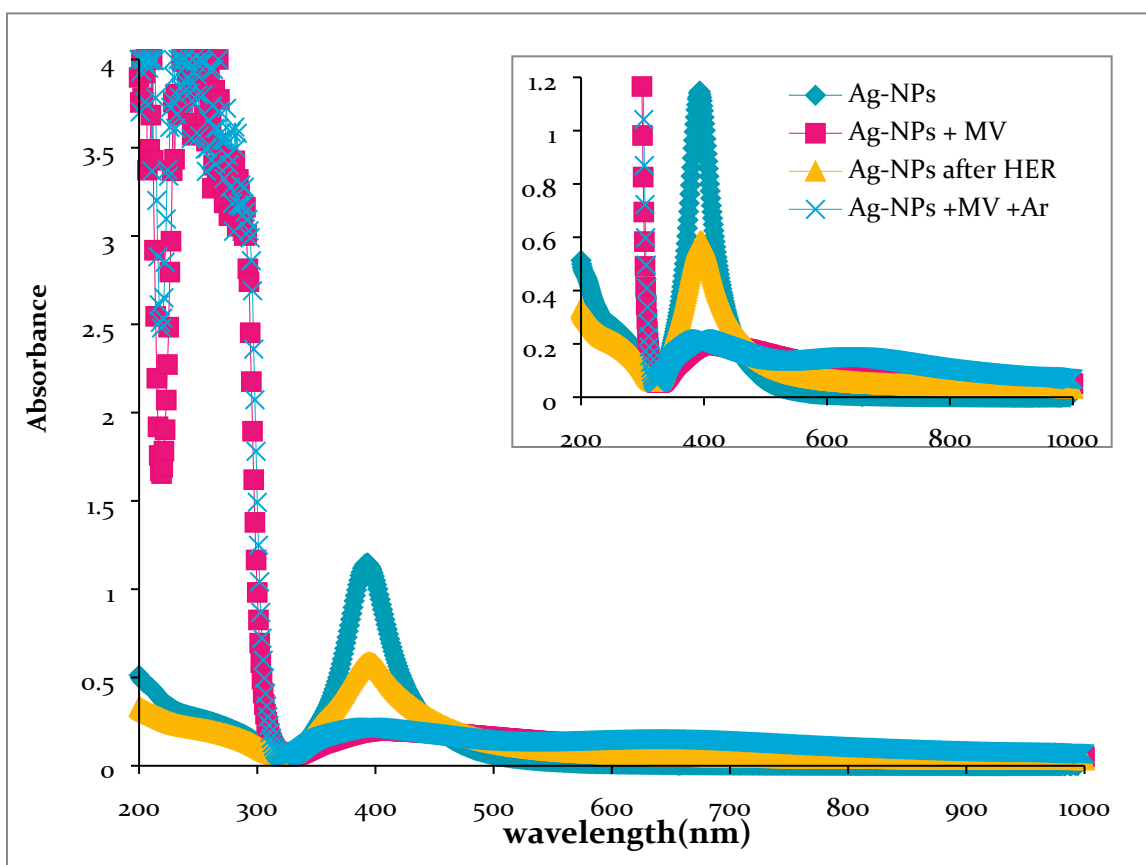

Figure S5: UV-Vis spectra of 3.8nm  $Ag^0$ -NPs (◆)  $Ag^0$ -NPs before HER, maximum absorption  $395 \pm 2$  nm. (▲)  $Ag^0$ -NPs after HER, maximum absorption  $394 \pm 2$  nm. (■)  $Ag^0$ -NPs after HER with methyl-viologen,  $[MV] = 1mM$ . (×)  $Ag^0$ -NPs after HER with methyl-viologen  $[MV] = 1mM$  in argon atmosphere, maximum absorption  $637 \pm 2$  nm.

## Tables

**Table S1: Hydrogen binding energies (eV) on different adsorption sites on M(111) surface.**

| Metal | fcc  | hcp  | bridge | atop |
|-------|------|------|--------|------|
| Cu    | 3.09 | 3.09 | 2.96   | 2.53 |
| Ag    | 3.16 | 3.18 | 3.05   | 2.79 |
| Au    | 3.30 | 3.25 | 3.27   | 3.12 |
| Ni    | 4.11 | 4.09 | 3.96   | 3.53 |
| Pd    | 3.98 | 3.94 | 3.85   | 3.51 |
| Pt    | 3.91 | 3.86 | 3.87   | 3.93 |
| Co    | 4.12 | 4.12 | 3.99   | 3.60 |

**Table S2: The binding energies of a hydrogen atom on the fcc site of M(111) surfaces**

| Metal | H binding energy (eV) <sup>a</sup> |              |                      |                     | TPD H <sub>2</sub><br>desorption<br>measurements<br>(K) [1–7] |
|-------|------------------------------------|--------------|----------------------|---------------------|---------------------------------------------------------------|
|       | This research                      |              | Greeley et<br>al.[8] | Ferrin et<br>al.[9] |                                                               |
|       | In Aqueous<br>Phase                | In Gas Phase |                      |                     |                                                               |
| Cu    | 3.49                               | 2.59         | 2.39                 | 2.45                | 200-220                                                       |
| Ag    | 2.99                               | 3.14         | 2.08                 | 2.12                | 180                                                           |
| Au    | 3.17                               | 3.15         | 2.22                 | 2.18                | 108-111                                                       |
| Ni    | 3.91                               | 3.91         | 2.89                 | 2.94                | 335-370                                                       |
| Pt    | 3.76                               | 3.72         | 2.72                 | 2.72                | 270-300                                                       |
| Pd    | 3.77                               | 3.78         | 2.88                 | 2.88                | 300                                                           |
| Co    | 3.93                               | 3.93         | 2.89                 | -                   | -                                                             |

**Table S3: The ZPE (eV) values of the metal surface before and after the adsorption of hydrogen atom in aqueous and gaseous medium.**

| M  | Surface ZPE (aq) (eV) |                    | Surface ZPE (gas) (eV) |                    |
|----|-----------------------|--------------------|------------------------|--------------------|
|    | Pristine              | After H adsorption | Pristine               | After H adsorption |
| Cu | 2.86                  | 3.24               | 2.57                   | 3.08               |
| Ag | 0.90                  | 1.08               | 1.06                   | 1.06               |
| Au | 0.82                  | 0.97               | 0.93                   | 0.93               |
| Ni | 1.67                  | 1.67               | 1.67                   | 1.67               |
| Pt | 1.46                  | 1.49               | 1.33                   | 1.36               |
| Pd | 1.80                  | 1.75               | 1.64                   | 1.60               |
| Co | 1.70                  | 1.71               | 1.69                   | 1.69               |

**Table S4: The hydrogen binding energies and charge on H atoms with and without the presence of a co-adsorbed H<sub>2</sub>O molecule.**

| M  | H* alone    |              | H* in presence of H <sub>2</sub> O* |              |
|----|-------------|--------------|-------------------------------------|--------------|
|    | H* B.E (eV) | Charge on H* | H* B.E (eV)                         | Charge on H* |
| Cu | 3.49        | -0.29        | 3.46                                | -0.30        |
| Ag | 2.99        | -0.22        | 3.13                                | -0.22        |
| Au | 3.17        | -0.10        | 3.14                                | -0.07        |
| Ni | 3.91        | -0.33        | 3.90                                | -0.33        |
| Pd | 3.77        | -0.16        | 3.79                                | -0.15        |
| Pt | 3.76        | -0.12        | 3.72                                | -0.12        |
| Co | 3.93        | -0.39        | 3.93                                | -0.38        |

**Table S5: Charge on adsorbed hydrogen on a neutral and charged surface, Q is the charge of the surface.**

| M  | Q = 0 | Q = -1 | Q = +1 |
|----|-------|--------|--------|
| Cu | -0.29 | -0.33  | -0.27  |
| Ag | -0.22 | -0.24  | -0.20  |
| Au | -0.10 | -0.10  | -0.07  |
| Ni | -0.33 | -0.36  | -0.30  |
| Pd | -0.16 | -0.19  | -0.15  |
| Pt | -0.12 | -0.14  | -0.10  |
| Co | -0.39 | -0.42  | -0.35  |

**Table S6: The optimized geometries (top view\*) of hydrogen adsorbed on Ag(111), Au(111) and Cu(111) surface.**

| No. of Hydrogens | Cu(111)                                                                             | Ag(111)                                                                             | Au(111)                                                                               |
|------------------|-------------------------------------------------------------------------------------|-------------------------------------------------------------------------------------|---------------------------------------------------------------------------------------|
| 1                | 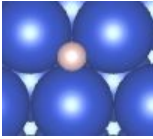   |    |    |
| 2                |    |    |    |
| 8                |   |   |   |
| 9                |  |  |  |

\* In the last row a side view is given for Au, to show the deformation of Au(111) in 9/8 coverage ratio.



**Table S7: The optimized geometries of hydrogen adsorbed on Co(111), Ni(111), Pd(111) and Pt(111) surface.**

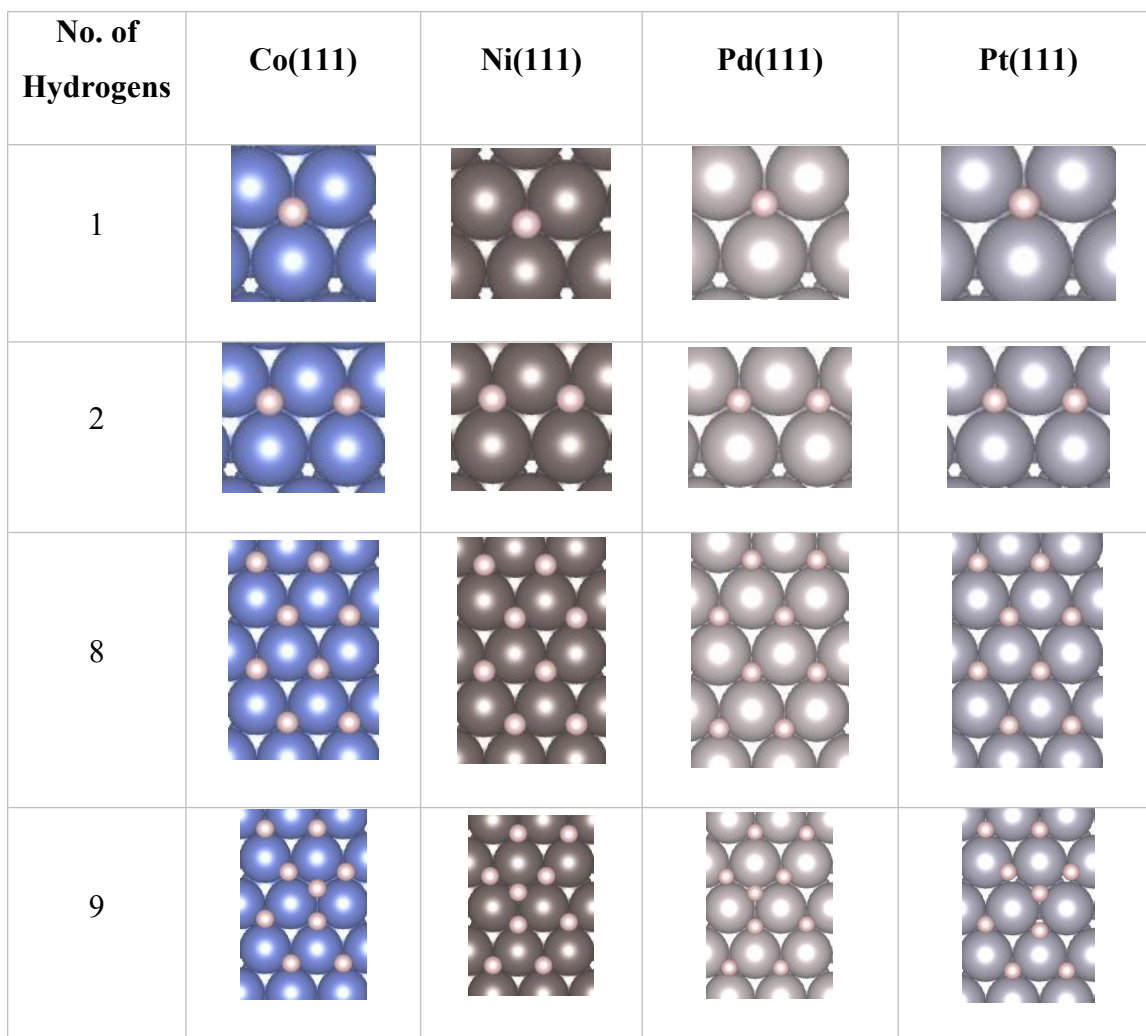

**Table S8:  $\Delta G_{H_2(aq)}$  values on neutral and charged  $M(111)$  surfaces,  $Q$  is the charge of the surface.**

| M  | No. of Hydrogens | $\Delta G_{H_2(aq)}$ (eV) |        |
|----|------------------|---------------------------|--------|
|    |                  | Q = 0                     | Q = -1 |
| Cu | 8                | 0.09                      | 0.10   |
|    | 9                | -1.02                     | -1.13  |
| Ag | 9                | -1.52                     | -1.60  |
| Au | 7                | -0.58                     | -0.60  |
| Ni | 9                | 0.37                      | 0.25   |
|    | 10               | -0.61                     | -0.78  |
| Pd | 9                | 0.25                      | 0.14   |
|    | 10               | -0.45                     | -0.66  |

|           |    |       |       |
|-----------|----|-------|-------|
| <b>Pt</b> | 8  | 0.82  | 0.73  |
|           | 9  | 0.00  | -0.09 |
| <b>Co</b> | 9  | 0.46  | 0.38  |
|           | 10 | -0.28 | -0.39 |

**Table S9:** The  $E_a$  barriers for the  $H_2$  evolution from  $M(111)$  surfaces at  $10/8$  ML coverage.

| <b>M(111)</b> | <b><math>E_a</math> (eV)</b> |               |
|---------------|------------------------------|---------------|
|               | <b>Q = 0</b>                 | <b>Q = -1</b> |
| Pd            | 0.36                         | 0.34          |
| Ni            | 0.38                         | 0.43          |
| Co            | 0.26                         | 0.32          |

**Table S10:** The  $E_a$  barriers (eV) for the  $H_2$  dissociation and formation from  $M(111)$  surfaces at  $2/8$  ML coverage:  $* +H_{2(aq)} \rightarrow 2*H$

| <b>M</b>  | <b><math>H_2</math><br/>dissociation<br/>barriers</b> | <b><math>H_2</math><br/>formation<br/>barrier</b> |
|-----------|-------------------------------------------------------|---------------------------------------------------|
| <b>Cu</b> | 0.29                                                  | 0.94 <sup>a</sup>                                 |
| <b>Ag</b> | 1.13 <sup>a</sup>                                     | 0.79                                              |
| <b>Au</b> | 0.64 <sup>a</sup>                                     | 0.65                                              |
| <b>Ni</b> | 0.18                                                  | 1.04 <sup>a</sup>                                 |
| <b>Pd</b> | 0.00                                                  | 1.19 <sup>a</sup>                                 |
| <b>Pt</b> | 0.00                                                  | 1.45 <sup>a</sup>                                 |
| <b>Co</b> | 0.00                                                  | 1.67 <sup>a</sup>                                 |

<sup>a</sup> These reactions are endergonic.

## **VASP INCAR File**

Job Title

#Start parameters

INIWAV = 1

ISTART = 0

ICHARG = 2

#Electronic Relaxation

ALGO = FAST

AMIX = 0.1

BMIX = 0.001

ENMAX = 400

EDIFF = 1E-04

ISMEAR = 1

NELM = 120

IVDW = 1           #dispersion correction

LSOL = .TRUE.      #solvation

#Ionic Relaxation

IBRION = 2

NSW = 150

ISIF = 2

#Performance optimization

NCORE = 16

LREAL = Auto

#Phonon Calculation (changes and additions in the INCAR)

NFREE = 2

POTIM = 0.15 #Different values are used (Section 2)

IBRION = 6

NSW = 1

#DOS calculation (changes and additions in the INCAR)

ISMEAR = -5

IBRION = -1

ICHARG = 11

LORBIT = 11

NEDOS = 500

NSW = 0

#TS calculation (changes and additions in the INCAR)

IBRION = 3

POTIM = 0

IOPT = 3

LCLIMB = .TRUE.

IMAGES = 5

TIMESTEP = 0.01

SIGMA = 0.05

SPRING = -5

LSCALAPACK = .FALSE.

## References

- [1] S.T. Ceyer, The Unique Chemistry of Hydrogen beneath the Surface: Catalytic Hydrogenation of Hydrocarbons, *Acc. Chem. Res.* 34 (2001) 737–744. <https://doi.org/10.1021/ar970030f>.
- [2] G. Pauer, A. Winkler, Water formation on Pd(111) by reaction of oxygen with atomic and molecular hydrogen, *J. Chem. Phys.* 120 (2004) 3864–3870. <https://doi.org/10.1063/1.1643352>.
- [3] P.B. Lloyd, M. Swaminathan, J.W. Kress, B.J. Tatarchuk, Temperature programmed desorption study of the adsorption and absorption of hydrogen on and in Cu(111), *Appl. Surf. Sci.* 119 (1997) 267–274. [https://doi.org/10.1016/S0169-4332\(97\)00178-5](https://doi.org/10.1016/S0169-4332(97)00178-5).
- [4] T. Kammler, J. Küppers, Interaction of H atoms with Cu(111) surfaces: Adsorption, absorption, and abstraction, *J. Chem. Phys.* 111 (1999) 8115–8123. <https://doi.org/10.1063/1.480145>.
- [5] G. Lee, P.T. Sprunger, M. Okada, D.B. Poker, D.M. Zehner, E.W. Plummer, Chemisorption of hydrogen on the Ag(111) surface, *J. Vac. Sci. Technol. A Vacuum, Surfaces, Film.* 12 (1994) 2119–2123. <https://doi.org/10.1116/1.579147>.
- [6] M. Pan, D.W. Flaherty, C.B. Mullins, Low-Temperature Hydrogenation of Acetaldehyde to Ethanol on H-Precovered Au(111), *J. Phys. Chem. Lett.* 2 (2011) 1363–1367. <https://doi.org/10.1021/jz200577n>.
- [7] K. Christmann, G. Ertl, T. Pignet, Adsorption of hydrogen on a Pt(111) surface, *Surf. Sci.* 54 (1976) 365–392. [https://doi.org/10.1016/0039-6028\(76\)90232-6](https://doi.org/10.1016/0039-6028(76)90232-6).
- [8] J. Greeley, M. Mavrikakis, Surface and Subsurface Hydrogen: Adsorption Properties on Transition Metals and Near-Surface Alloys, *J. Phys. Chem. B.* 109 (2005) 3460–3471. <https://doi.org/10.1021/jp046540q>.
- [9] P. Ferrin, S. Kandoi, A.U. Nilekar, M. Mavrikakis, Hydrogen adsorption, absorption and diffusion on and in transition metal surfaces: A DFT study, *Surf. Sci.* 606 (2012)

679–689. <https://doi.org/10.1016/j.susc.2011.12.017>.
